# Supplementary material for: Frontline healthcare workers’ experiences with personal protective equipment during the COVID-19 pandemic in the UK: a rapid qualitative appraisal
Source: HighWire-hosted journal article supplement (doi:10.1136/bmjopen-2020-046199), 2021-01-01
Supplement: bmjopen-2020-046199supp002_data_supplement.pdf [file bmjopen-2020-046199supp002_data_supplement.pdf]

## Appendix 2: Interview Topic Guide

**INTERVIEW GUIDE: HEALTHCARE WORKERS (HCWs)**

Date:

| Gender | Age | Time in service (mm/yy) | Education level | Role/position | Ethnicity | Sector and type of facility | Location of facility | Follow-up? |
|--------|-----|-------------------------|-----------------|---------------|-----------|-----------------------------|----------------------|------------|
|        |     |                         |                 |               |           |                             |                      |            |

**Respondent Information**

*"The interview takes about 20-25 minutes on average, but it can go on longer depending on how much you want to say"*

**First, I want to ask you about your work and the services you provide.**

**1. Background: Can you tell me about your role?**

- Can you tell me a bit about your role? (e.g. Daily tasks, department, responsibilities)

**2. Have you been in contact with patients who had suspected and/or confirmed COVID-19?**

*Probes:*

- In what capacity?
- How have you found working around these patients?
- PPE physical effects? (E.g. dehydration, discomfort, restriction in movement, difficulties communicating)
- How has PPE impacted the type of care you provide patients?
- What psychological/emotional impact did this have on you?

**3. How has the COVID-19 outbreak affected health services in your department?**

*Probes:*

- How has this affected your normal daily tasks/responsibilities? Change of role?
- Impact of COVID-19 on the delivery of services to non-COVID-19+ patients (i.e. cancellation of elective surgeries)
- What tasks are you able to do more or less effectively?
- How do you manage the isolation of suspected cases and confirmed cases?
- Has there been appropriate transfer of patients within and out of hospital?
- Has there been an impact on staff's ability to make diagnoses and act on them?
- Has the supply of drugs, equipment and PPE been affected?
- Have staff been redeployed from or within your health facility

**4. What were the preparedness strategies implemented locally (department, hospital or Trust)?**

- Did you feel these strategies were enough?
- What do you feel was particularly successful?
- Should the Trust have prepared differently?
- Did you receive any training? (including but not limited to PPE training such as mental health and well-being training)
- Did you have access to guidance on PPE?

**5. Do you currently have any concerns or fears in relation to ...**

- *Work (response efforts, PPE, services)*
- *The national effort*

**6. Over the past months, have you experienced any problems with aspects of your daily life such as sleeping, eating, concentration, or additional worries or anxiety?****7. Mental health support (to address risk of moral injury, trauma and developing severe mental health problems)**

- *Are you aware of any support available for staff wellbeing and mental health?*
- *Have you had the opportunity to talk about your mental health with your supervisor/team leader?*
- *Have you had worrying experiences in the last week? Did you receive support after? If so, what type of support? (including formal and informal support)*
- *Interactions between peers: Do you have time to socialise with your team? What has changed with COVID-19?*

**8. Have you been involved in caring for patients who are dying or expected to die soon?**

If YES: Can you please tell me about your experience caring for these patients (e.g. what have you done, what were your responsibilities)?

*Prompt: Advanced care planning, Symptom management/comfort, End of life decision making or Communicating with families.*

- *How have you found these tasks?*
- *What difficulties or challenges have you faced in delivering this type of care?*
- *Do you feel this has had an emotional impact on you?*
- *Was this part of your normal role prior to COVID-19?*
- *Was there training or support available relating to this?*
- *Have you had to communicate with family members, how has that been?*
- *How does this differ to normal palliative care?*
- *How much choice do patients have?*
- *What are the rules/policies relating to this? Do you feel these are suitable?*

**9. What do you feel is most important to offer COVID-19 patients at end of life and their families?**

- *What is working well?*
- *What can we improve?*
- *What support do we need to offer HCW delivering palliative care?*
- *Are you able to offer bereavement support to families?*

**10. OTs/PTs and others in charge of rehab: What are your main concerns about the impact of COVID-19 to the body (e.g. muscle degeneration, dexterity, impact to the lungs etc.)?**

- *What resources do you have to deliver rehabilitation care? - ask their opinions on the Mary Seacole rehab hospital*
- *Is there a difference in resources for COVID-19 and non-COVID-19 patients?*

**11. (If relevant based on previous discussion) Can you please tell me about the rehabilitation care tasks you are involved in with recovered COVID-19 patients?**

- *Have you received any guidance on how to deliver rehabilitation services to recovered COVID-19 patients?*
- *OT: How does this differ from normal rehabilitation care e.g. delivering care at home?*
- *OT: How has COVID-19 impacted your contact with patients?*
- *Has the pandemic impacted the flow of your patients through hospital e.g. are more or less patients being discharged to homes and bed-based rehab? - What is the impact of this?*
- *How do you think your role will be impacted as a growing number of people will need rehabilitation? Any concerns?*

**General reflections**

**12. How have health services been strengthened, or how could they be strengthened during the outbreak?**

*Probes:*

- *Support to HCWs from the health system and partners?*
- *Capacity for rapid response*
- *Policies? e.g. Guidance and emergency protocols?*
- *What would help HCWs to maintain normal services as well as COVID related services?*
- *If GP: Health promotion and community engagement. How?*
- *If GP: Linkage to other support organisations, e.g. charities, schools?*

**13. Is there anything you feel should be changed to make health services more effective in future emergencies?**

*Probes:*

- *Support to HCWs? From whom and How?*
- *Coordination and official guidance of COVID-19 response.*
- *Early detection and reporting.*
- *On-going health promotion and community education. E.g. potential sources of infection, safe practice?*
- *Mobilisation? E.g. identifying and coordinating trusted community volunteers and support?*
- *Disease outbreak control activities?*
- *Testing (public and staff)*

**14. Do you feel your experience has been different from other HCWs? Does gender play a role? How about race or ethnicity?**

**15. How has your life at home been impacted by COVID-19?**

**16. Do you have any caring responsibilities, such as children or elderly family members?**

If yes:

- a. *How are you managing care during the COVID-19 pandemic?*
- b. *(If they have children) How has being a HCW during the pandemic impacted your ability to parent? \*\*time/experiences with your children?*

- c. What fears, worries, or emotions arise from the responsibility of caring for others during this time?

**18. Is there anything else you would like to mention that you feel is important?**

**Thank you for your time and for sharing your opinions and experiences with us.**
