# Supplementary material for: Frontline healthcare workers’ experiences with personal protective equipment during the COVID-19 pandemic in the UK: a rapid qualitative appraisal
Source: PubMed Central journal article supplement — BMJ Open. 2021 Jan 20;11(1):e046199. doi: 10.1136/bmjopen-2020-046199 (PMC7818840; doi:10.1136/bmjopen-2020-046199), 2021-01-20
Supplement: bmjopen-2020-046199supp003.pdf [file bmjopen-2020-046199supp003.pdf]

## Appendix 3: Inclusion criteria and search terms

|                           |                              |                                                                                                                                                                                                                                                                                                                                                                                                                                                                                                                                                                                                                                                                                                                                                                                                                                                                                                                                                                                                                    |
|---------------------------|------------------------------|--------------------------------------------------------------------------------------------------------------------------------------------------------------------------------------------------------------------------------------------------------------------------------------------------------------------------------------------------------------------------------------------------------------------------------------------------------------------------------------------------------------------------------------------------------------------------------------------------------------------------------------------------------------------------------------------------------------------------------------------------------------------------------------------------------------------------------------------------------------------------------------------------------------------------------------------------------------------------------------------------------------------|
| <b>Inclusion criteria</b> | <b>Newspaper data</b>        | 1) Published between 15 March 2020 and 5 June 2020;<br>2) Aimed at healthcare delivery;<br>3) Related to the COVID-19 pandemic;<br>4) Related to personal protective equipment.                                                                                                                                                                                                                                                                                                                                                                                                                                                                                                                                                                                                                                                                                                                                                                                                                                    |
|                           | <b>Social media data</b>     | 1) Published between 1 December 2019 and 31 May 2020.;<br>2) Aimed at healthcare delivery;<br>3) Related to the COVID-19 pandemic;<br>4) Related to personal protective equipment.                                                                                                                                                                                                                                                                                                                                                                                                                                                                                                                                                                                                                                                                                                                                                                                                                                 |
|                           | <b>Policy data</b>           | 1) Published between 1 December 2019 and 5 June 2020.;<br>2) Aimed at healthcare delivery;<br>3) Related to the COVID-19 pandemic;<br>4) Related to personal protective equipment.                                                                                                                                                                                                                                                                                                                                                                                                                                                                                                                                                                                                                                                                                                                                                                                                                                 |
| <b>Search terms</b>       | <b>Media and policy data</b> | COVID-19 OR coronavirus OR corona                                                                                                                                                                                                                                                                                                                                                                                                                                                                                                                                                                                                                                                                                                                                                                                                                                                                                                                                                                                  |
|                           | <b>Social media data</b>     | ((bio:"healthcare professional" OR bio:"healthcare worker" OR bio:"doctor" OR bio:"NHS" OR bio:"nurse" OR bio:"physio*" OR bio:"Paramedic" OR bio:"Ambulance work*" OR bio:"Ambulance driver*") AND ("coronavirus" OR "#coronavirus" OR "corona" OR "COVID-19" OR "COVID 19" OR "COVID19" OR "#COVID19" OR "COVID_19" OR "COVID" OR "severe acute respiratory syndrome coronavirus 2" OR "severe acute respiratory syndrome coronavirus 2" OR "2019-nCoV" OR "SARS-CoV-2" OR "2019nCoV" OR "physio*" OR "PPE") OR ("i am" OR "as a" OR "source: I" OR "I'm a") near/5 ("doctor" OR "nurse" OR "doctors" OR "nurses" OR "Paramedic" OR "Ambulance worker" OR "Ambulance driver") AND ("coronavirus" OR "#coronavirus" OR "corona" OR "COVID-19" OR "COVID 19" OR "COVID19" OR "#COVID19" OR "COVID_19" OR "severe acute respiratory syndrome coronavirus 2" OR "severe acute respiratory syndrome coronavirus 2" OR "2019-nCoV" OR "SARS-CoV-2" OR "2019nCoV" OR "physio*" OR "PPE") NOT ("I am not" OR "I'm not")) |
